# Supplementary material for: Measurement report: Cloud condensation nuclei (CCN) activity in the South China Sea from shipborne observations during the summer and winter of 2021 – seasonal variation and anthropogenic influence
Source: Copernicus journal article supplement (doi:10.5194/acp-25-2495-2025), 2025-02-27
Supplement: Supplementary file 1 [file acp-25-2495-2025-supplement.pdf]

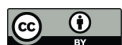

*Supplement of*

**Measurement report: Cloud condensation nuclei (CCN) activity in the South China Sea from shipborne observations during the summer and winter of 2021 – seasonal variation and anthropogenic influence**

**Hengjia Ou et al.**

*Correspondence to:* Mingfu Cai ([caimingfu@scies.org](mailto:caimingfu@scies.org))

The copyright of individual parts of the supplement might differ from the article licence.

25 Section S1, Table S1, Figure S1-S20

26

27 **Section S1 CE selection of the Tof-ACSM**

28 The selection of collection efficiency (CE) was based on previous observation conducted in  
 29 the South China Sea using the Tof-ACSM (Sun et al., 2023). We primarily considered the  
 30 influence of two factors: aerosol acidity and the impact of nitrate. The calculation was performed  
 31 using the following formula (Middlebrook et al., 2012):

32 Effect of high ammonium nitrate fraction (ANMF):

$$33 \quad ANMF = \frac{NO_3^- \times \left(\frac{80}{62}\right)}{SO_4^{2-} + NO_3^- + Cl^- + NH_4^+ + Organics} \quad (1)$$

$$34 \quad CE_{est,ANMF} = 0.0833 + 0.9167 \times ANMF \quad (2)$$

$$35 \quad CE_{dry,ANMF} = \max(0.5, CE_{est,ANMF}) \quad (3)$$

36 Effect of acidity:

$$37 \quad \frac{NH_4^+_{measurd}}{NH_4^+_{predicted}} = \frac{NH_4^+/18}{2 \times \left(\frac{SO_4^{2-}}{96}\right) + \left(\frac{NO_3^-}{62}\right) + \left(\frac{Cl^-}{35.5}\right)} \quad (4)$$

$$38 \quad CE_{est,acidity} = 1 - 0.73 \times \left(\frac{NH_4^+_{measurd}}{NH_4^+_{predicted}}\right) \quad (5)$$

$$39 \quad CE_{dry,acidity} = \max(0.5, CE_{est,acidic}) \quad (6)$$

40 As shown in Fig. S1, the ANMF is higher in winter compared to summer, although the impacts  
 41 are not highly pronounced. On the other hand, the effect of aerosol acidity is more significant in  
 42 summer and relatively lower in winter. Taking into account these factors and referring to Crenn et  
 43 al. (2015), we employed temporal-varying  $CE_{dry,acidic}$  according to eq. (6) in this study, as shown in  
 44 Fig. S3.

45 In addition, the SMPS data was used to compared with ACSM data in order to verify the CE  
 46 value. An average particle density ( $\rho$ ) of  $1.5 \text{ g cm}^{-3}$  was assumed to convert the PNSD data obtained  
 47 from the SMPS into mass concentrations (Geller et al., 2006) according to Eq. (7) and Eq. (8):

$$48 \quad \frac{dV}{d \log Dp} = \frac{\pi}{6} D_p^3 \frac{dN}{d \log Dp} \quad (7)$$

$$49 \quad M_{SMPS} = \int_{D_{p,min}}^{D_{p,max}} \rho \frac{dV}{d \log Dp} d \log Dp \quad (8)$$

50 where  $M_{SMPS}$  is the mass concentration from SMPS,  $D_{p,min}$  and  $D_{p,max}$  refer to the minimum and  
 51 maximum particle sizes scanned by the SMPS.  $dN/d \log Dp$  and  $dV/d \log Dp$  are particle number size  
 52 distribution and particle volume size distribution which could be measured by SMPS.

53 Overall, the mass concentration time series measured by the ACSM and SMPS showed strong  
 54 correlations, with correlation coefficients of 0.84 and 0.93 for summer and winter, respectively.

55 However, before May 27 (prior to the onset of the summer monsoon), when air masses  
56 predominantly originating from Luzon in the Philippines were observed, SMPS-derived values  
57 consistently exceeded those measured by the ACSM. According to Chao et al. (2022), the summer  
58 monsoon onset occurred during the sixth pentad of May, which was approximately represented as  
59 May 27 for simplicity here. This discrepancy may be attributed to the ACSM's inability to detect  
60 certain refractory materials.

61 To further investigate this discrepancy, we compared black carbon concentrations during two  
62 distinct periods, utilizing measurements from the Aethalometer (model AE33). The differences in  
63 BC concentration between these periods were minor ( $0.67 \mu\text{g m}^{-3}$  vs  $0.48 \mu\text{g m}^{-3}$ ), insufficient to  
64 account for the observed discrepancy between the SMPS-derived mass concentration and ACSM  
65 mass concentration. It is noteworthy that the AE33 might underestimate BC concentrations during  
66 May 5 to 27, owing to the lower detection efficiency for smaller black carbon particles ( $< 200 \text{ nm}$ )  
67 relative to larger ones (Nakayama et al., 2010; Drinovec et al., 2015). Prior to May 27, the South  
68 China Sea region was predominantly influenced by air masses originating from Luzon. The particle  
69 size distribution centered a size range of 50-150 nm (Fig. 2a1 in the manuscript), aligning with the  
70 particle size distribution of black carbon from urban emissions reported in Schwarz et al. (2008). It  
71 implies that the black carbon might distribute at a relatively small particle size range, which could  
72 not fully be detected by the AE33, potentially contributing to the discrepancy between the SMPS-  
73 derived and ACSM-measured mass concentrations.

74 Additionally, we analyzed data from another campaign conducted over the South China Sea in  
75 June 2022. During this campaign, a typhoon (Chaba) altered local circulation patterns, leading to  
76 the transport of substantial pollutants from the Indochinese Peninsula to the ocean after June 28th  
77 (Fig. S19). Under these conditions, the mass concentrations measured by the SMPS were again  
78 consistently higher than those measured by the ACSM (Fig. S20), suggesting that the small size  
79 black carbon particle could be the primary factor underlying the mass discrepancy.

80 A review of the literature indicates that discrepancies between SMPS and AMS (or ACSM)  
81 measurements have been observed at other locations as well (Sun et al., 2016; Wang et al., 2016;  
82 Kuang et al., 2020). When a CE of 0.5 was applied, the correlation coefficient for summer slightly  
83 increased from 0.84 to 0.85, though the overall difference remained negligible. Additionally,

84 differences in measurement ranges and methodologies between the SMPS and ACSM are likely  
85 contributing factors to these discrepancies.

86 **Table S1. The D<sub>50</sub> of different species in external scheme.**

| D <sub>50</sub> (nm) | 0.1% SS | 0.2% SS | 0.4% SS | 0.7% SS |
|----------------------|---------|---------|---------|---------|
| Sulfate              | 143     | 90      | 57      | 39      |
| Seasalt              | 109     | 69      | 43      | 30      |
| Nitrate              | 135     | 85      | 53      | 37      |
| Organic              | 242     | 192     | 152     | 126     |

87

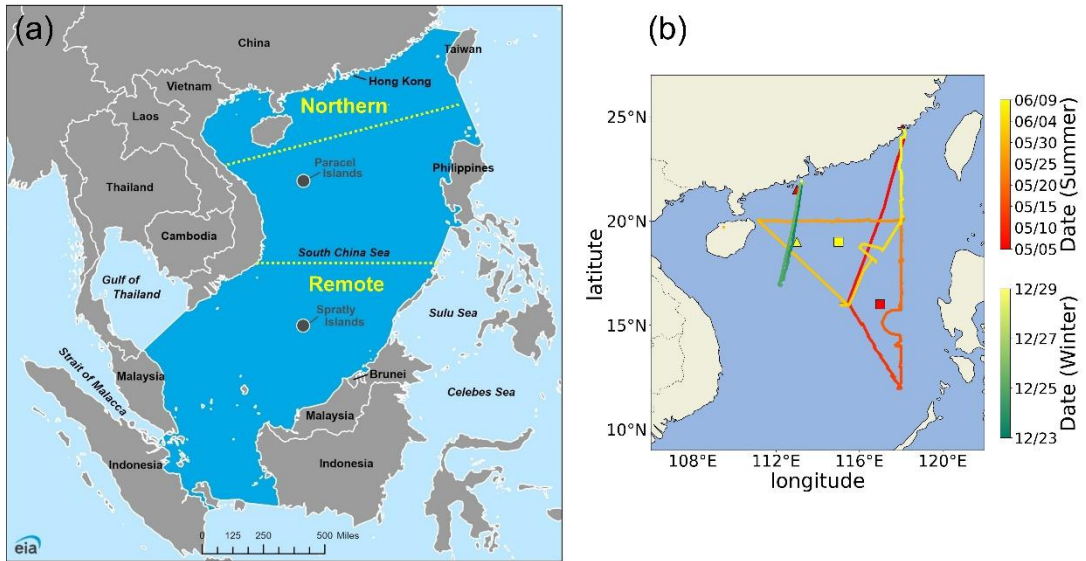

88

89 **Figure S1. The definition of South China Sea from U.S. Energy Information Administration**  
 90 **([https://www.eia.gov/international/analysis/regions-of-interest/South\\_China\\_Sea](https://www.eia.gov/international/analysis/regions-of-interest/South_China_Sea)) and the**  
 91 **yellow dash line and text were described the definition of northern and remote South China**  
 92 **Sea according to other researches (Atwood et al., 2017; Liang et al., 2021; Zhu et al., 2012)**  
 93 **(a); The cruises of these study (b).**

94

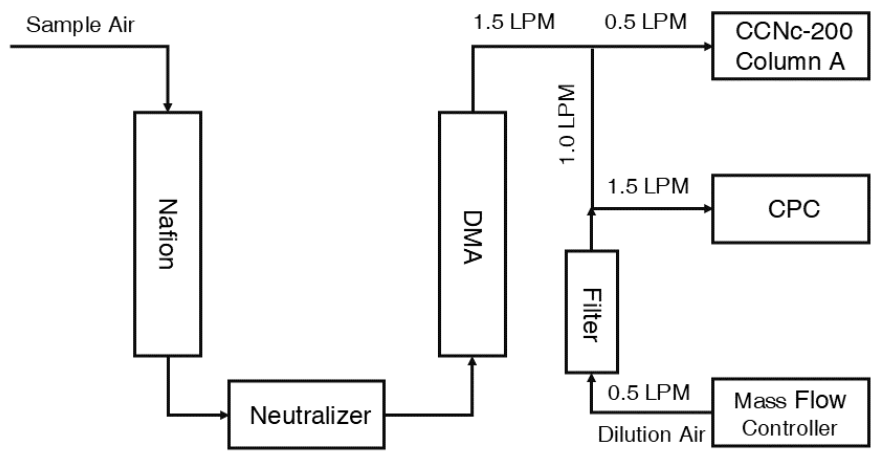

95

96 **Figure S2. Instrument setup of the SMCA system.**

97



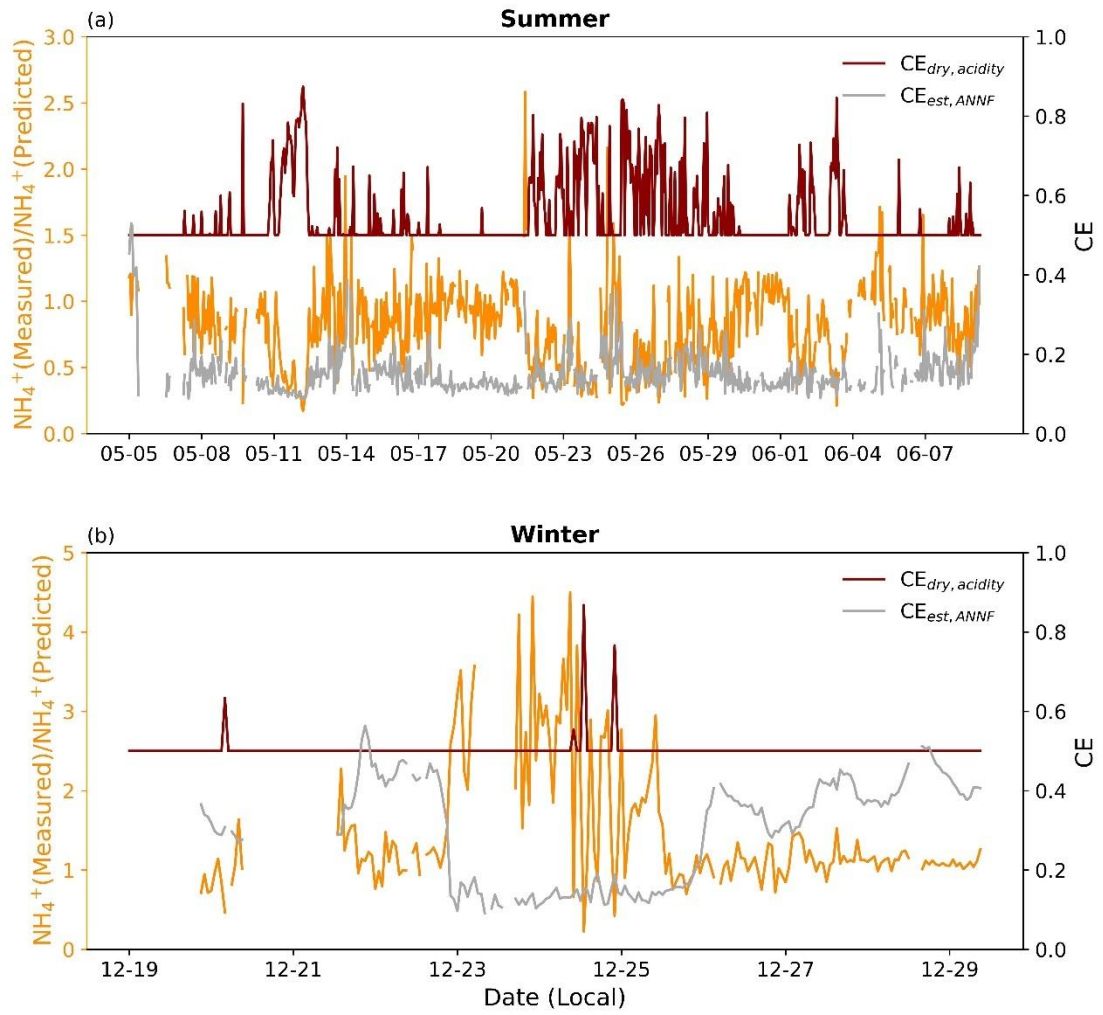

98

99 **Figure S3. Timeseries of  $\text{CE}_{\text{dry, acidity}}$ ,  $\text{CE}_{\text{est, ANNF}}$ , and  $\text{NH}_4^+_{\text{Measured}} / \text{NH}_4^+_{\text{predicted}}$ .**

100

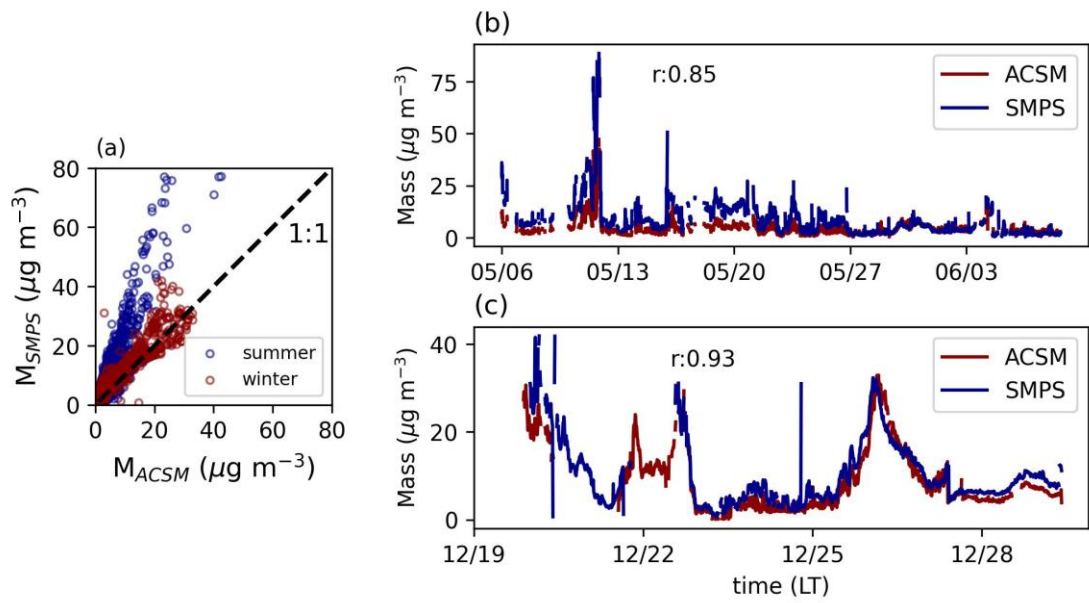

101

102 **Figure S4. Comparison of mass concentration from ACSM and SMPS (a), the timeseries of**

103 **mass concentration of ACSM and SMPS (b).**

104

105

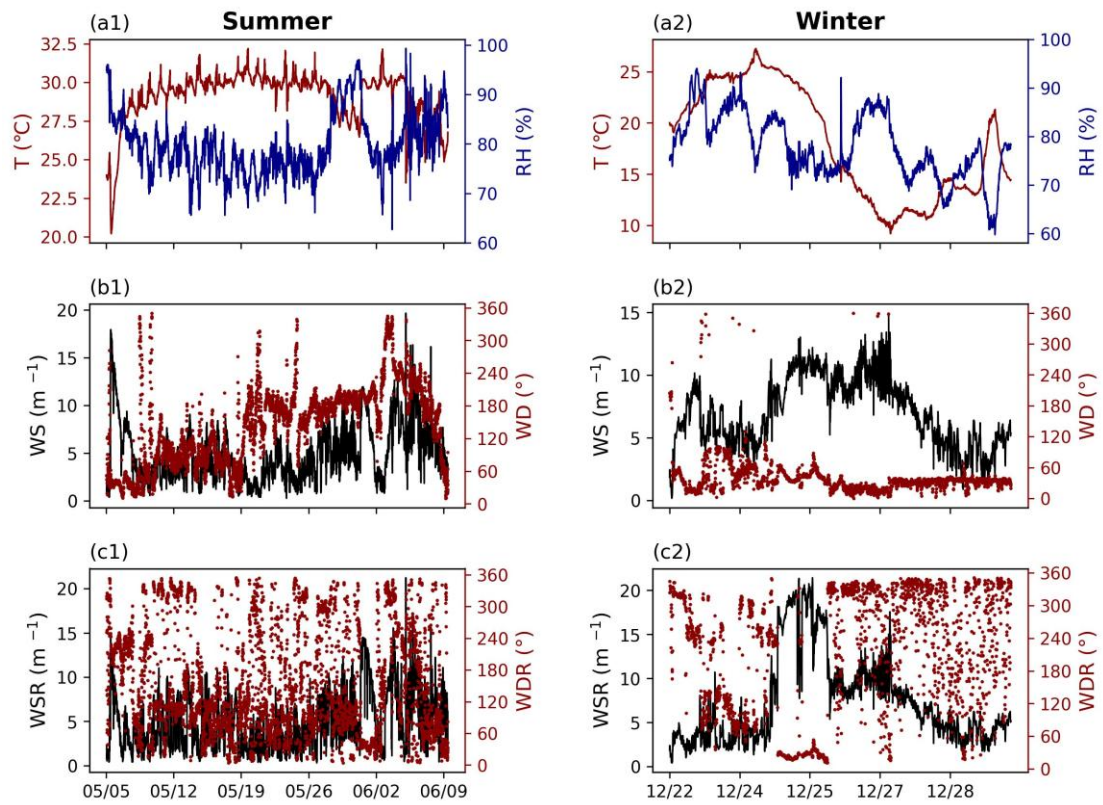

107

108 **Figure S5. Timeseries of temperature and relative humidity (a), wind speed and wind direction**  
 109 **(b), and relative wind speed and relative wind direction (c) in two cruises. The number 1 in**  
 110 **figure number is the timeseries in summer and number 2 in figure number is the timeseries**  
 111 **in winter.**

112

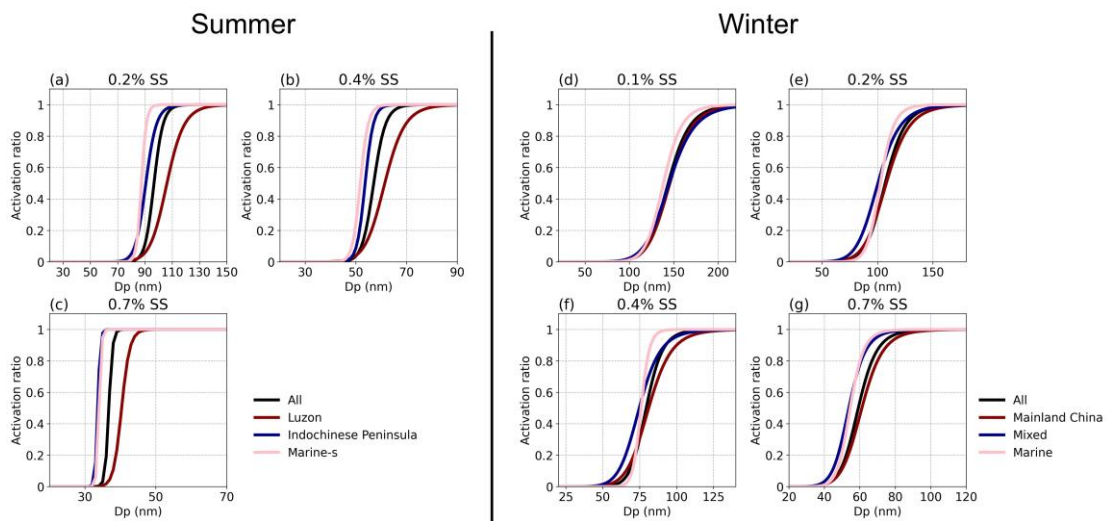

113

114 **Figure S6. The average size-resolved activation ratio (AR) fitting result at 0.2% SS (a), 0.4%**  
 115 **SS (b), and 0.7% SS (c) in different periods in summer; The average size-resolved activation**  
 116 **ratio (AR) fitting result at 0.1% SS (d), 0.2% SS (e), 0.4% SS (f), and 0.7% SS (g) in different**  
 117 **periods in winter.**

118

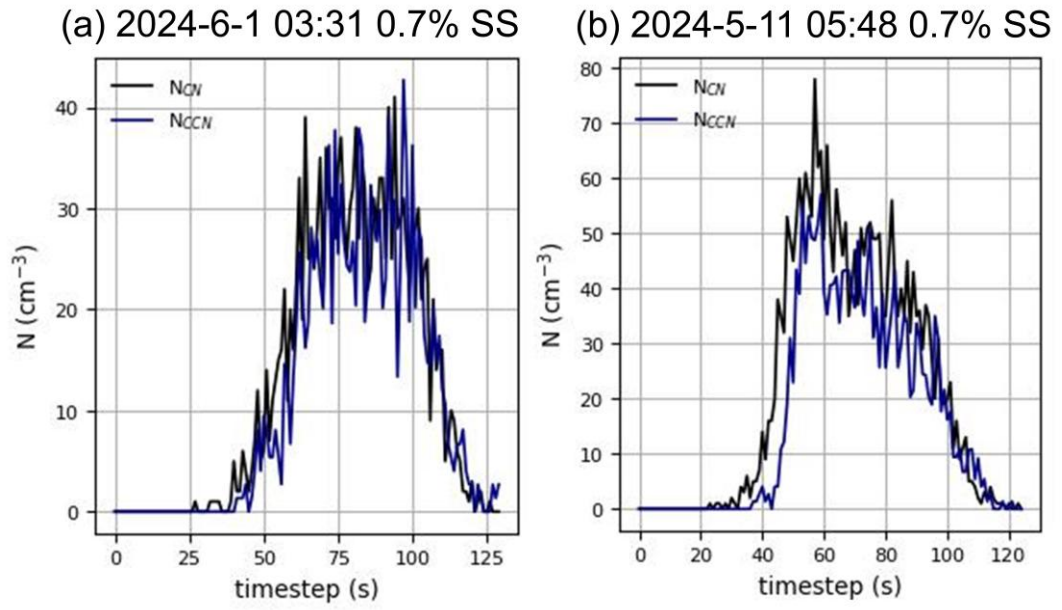

119

120 **Figure S7. An example in which D50 cannot be accurately determined (a), and an example in**

121 **which D50 can be precisely obtained (b).**

(a) Internal scheme

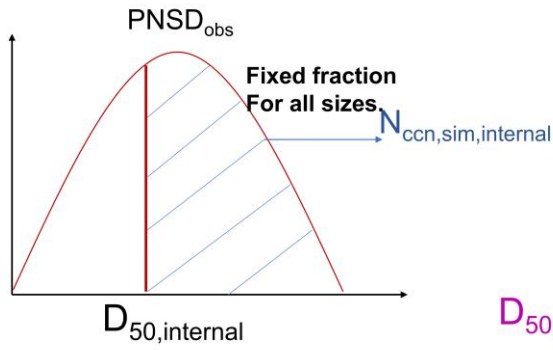

(b) External scheme

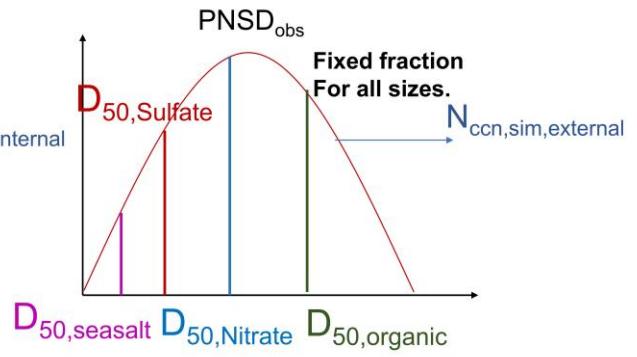

122

123 **Figure S8. The internal and external simulation scheme. The D50 in external scheme was**

124 **shown**

125

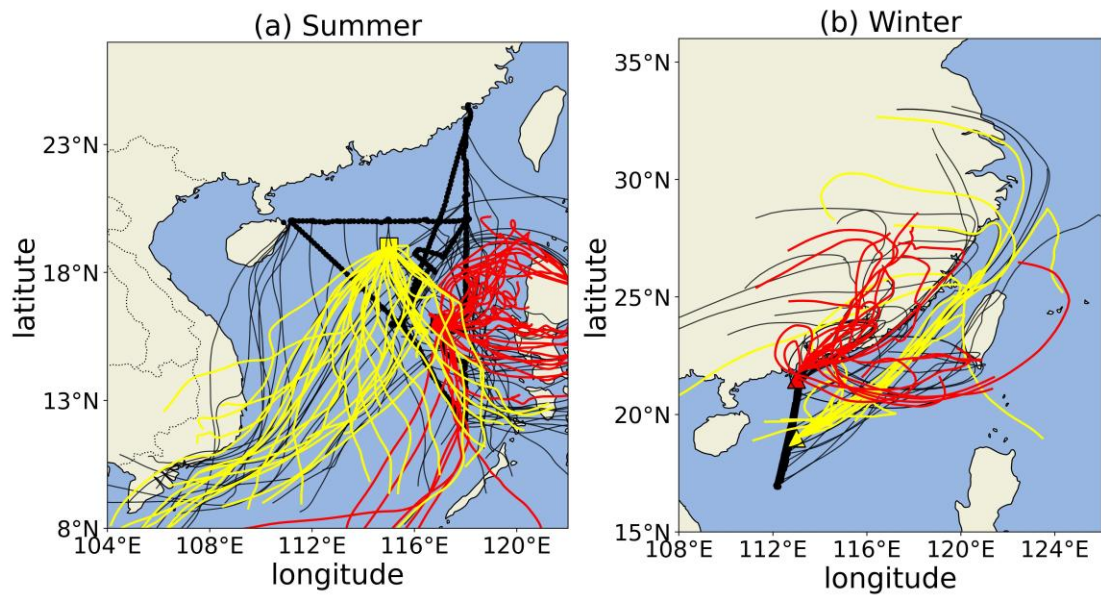

127

128 **Figure. S9. The backward trajectories of two midpoints (yellow and red line) and the location**  
129 **of research vessel (black line) during summer cruise (a) and winter cruise (b). The time**  
130 **interval for backward trajectories was 12 hours during the summer. Due to the shorter**  
131 **duration of the winter cruise, the time interval for the winter backward trajectories was set to**  
132 **6 hours to more accurately distinguish the trajectory sources.**

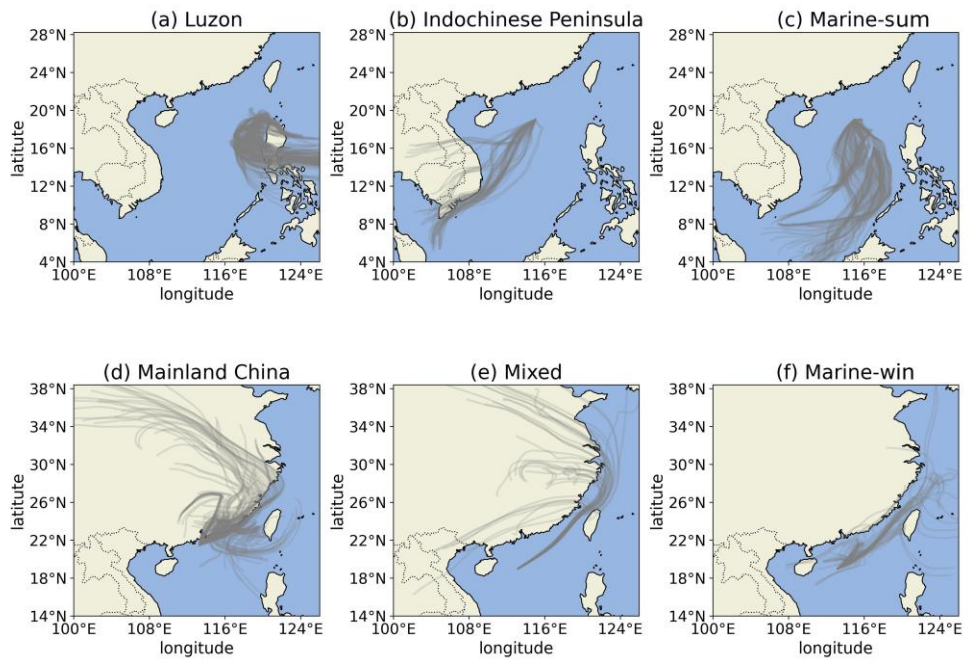

133

134 **Figure S10. The backward trajectories of different clusters in summer (a) and winter (b).**

135

136



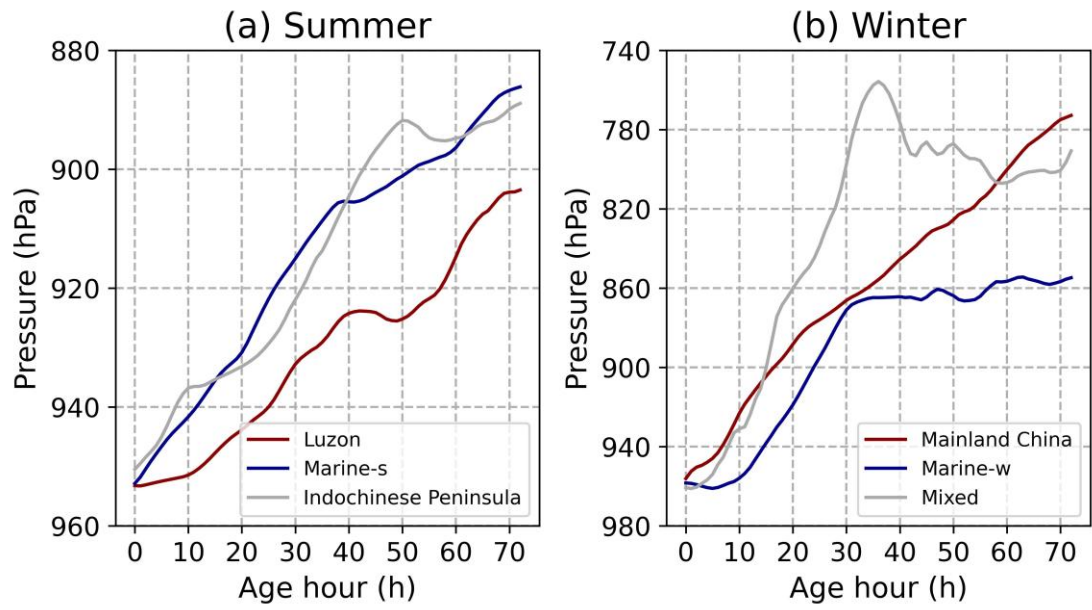

137

138 **Figure S11. The average pressure variation as age hour increased in different clusters in**  
 139 **summer (a) and winter (b).**

140

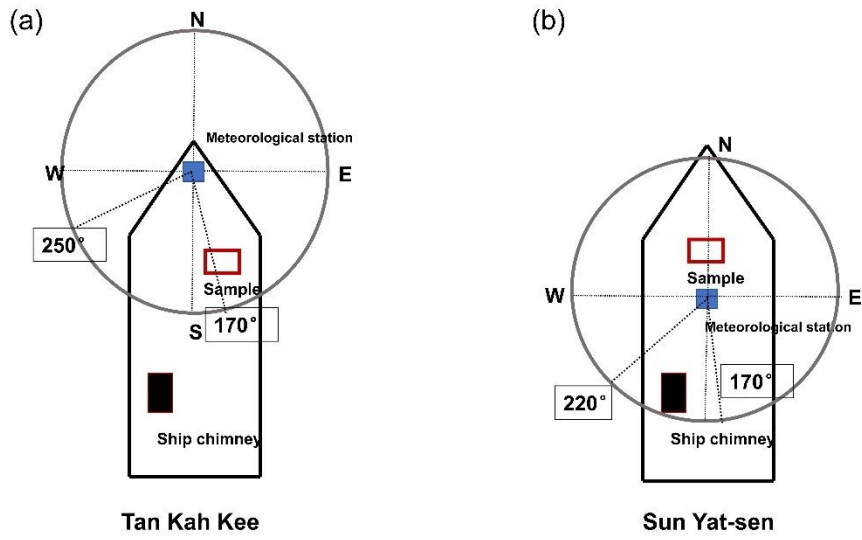

142

143 **Figure S12. Instrument and ship chimney location in two cruise.**

144

145

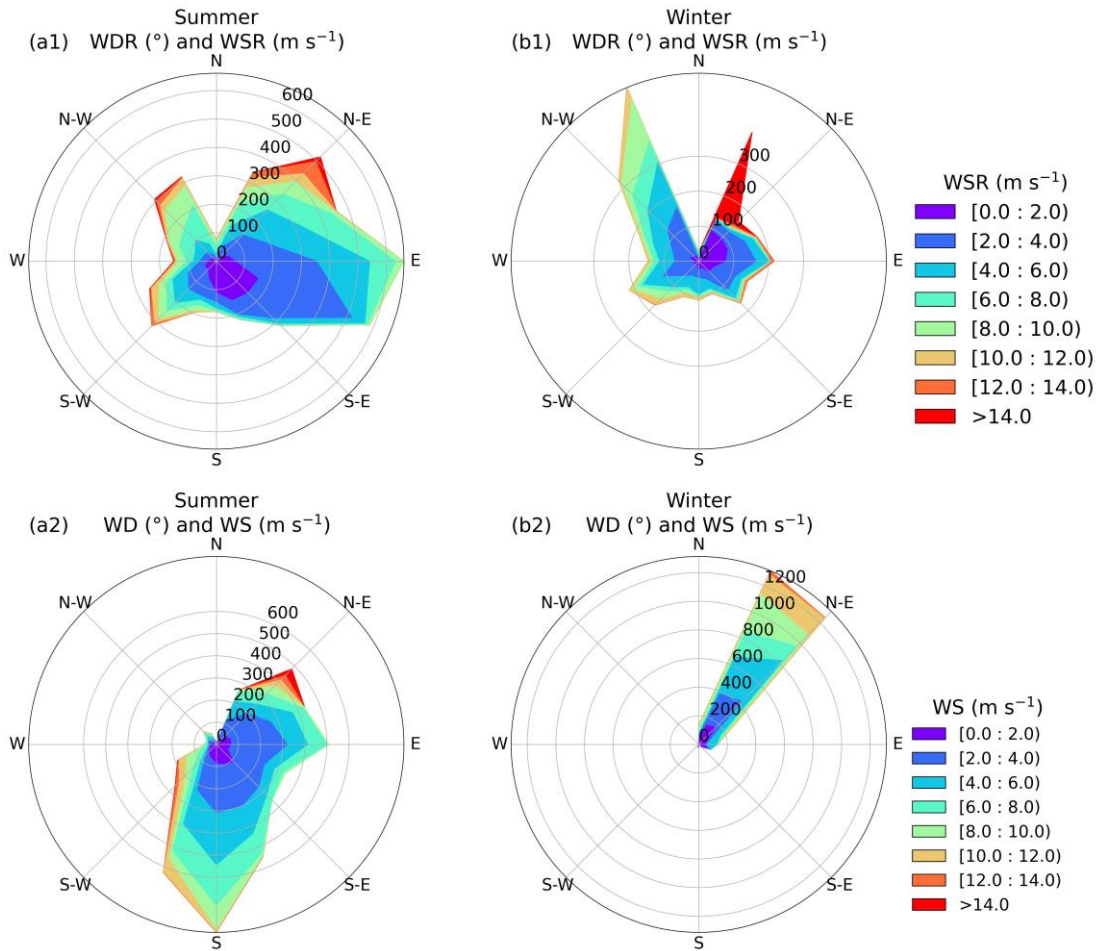

146

147 **Figure S13. Wind rose of the relative wind direction (with respect to the bow) and relative**  
 148 **wind speed (with respect to the ship speed) in summer and winter cruises; The radius**  
 149 **represents the frequency of wind direction occurrences, and the shaded areas indicate wind**  
 150 **speed (a1) and (b1); Wind rose of the wind direction and wind speed in summer and winter**  
 151 **(a2) and (b2).**

152

## Summer

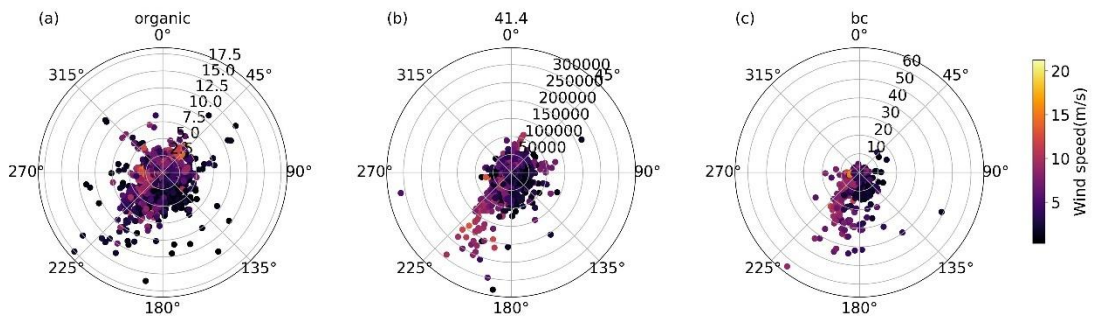

## Winter

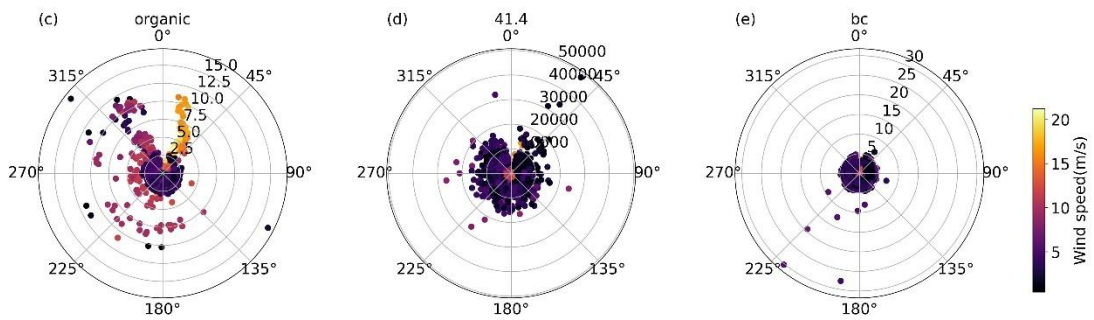

153

154 **Figure S14. Wind rose of the organic ( $\mu\text{g m}^{-3}$ ), particle in 41.4 nm ( $\text{cm}^{-3}$ ), and black carbon**  
155 **(BC,  $\mu\text{g m}^{-3}$ ) in summer (a-c) and winter (c-e) measurements; The radius represents the**  
156 **organic and BC mass concentration and number concentration ( $\text{dN}/\text{dlogDp}$ ) of particle in 41.4**  
157 **nm, and the color indicate wind speed.**

## Summer

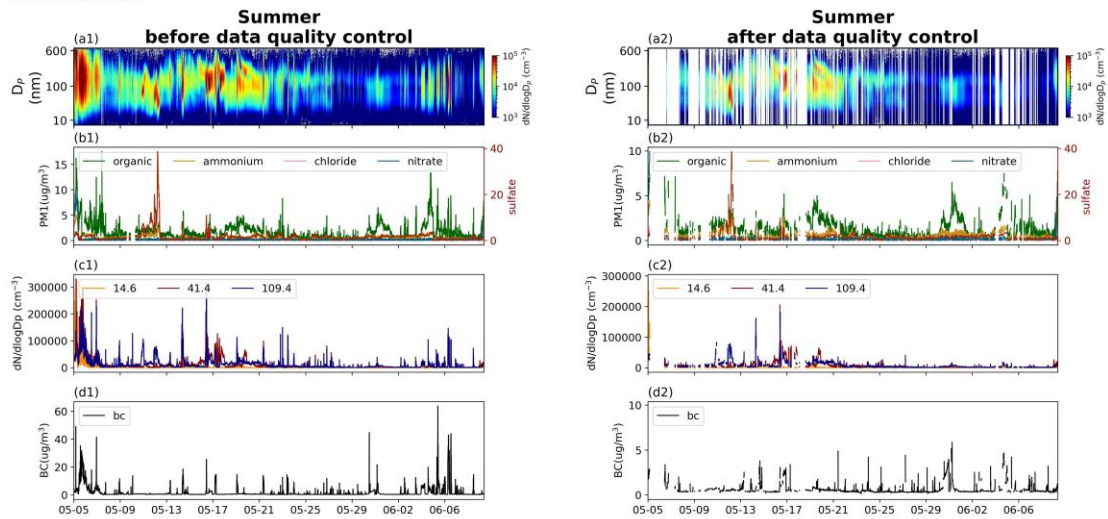

## Winter

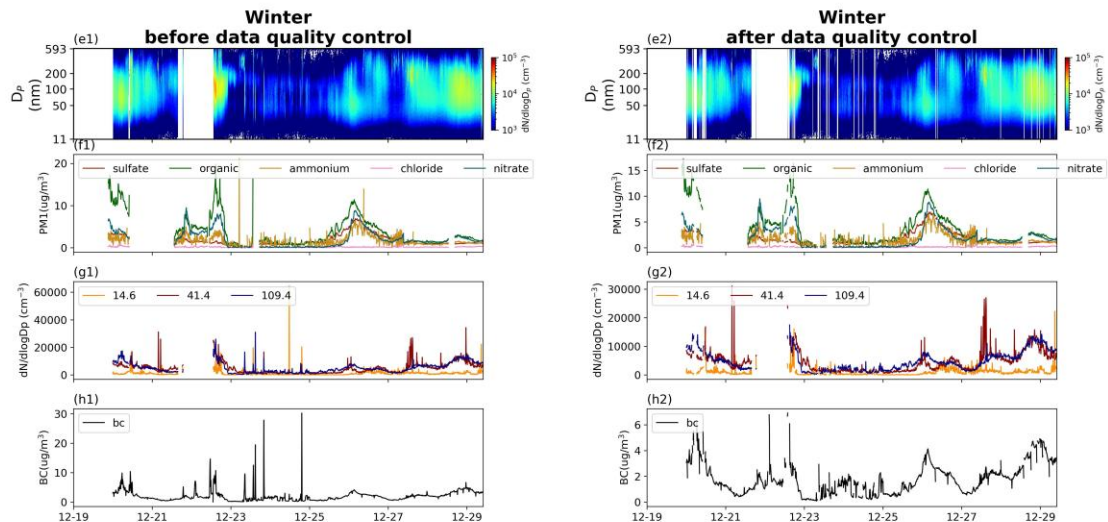

158

159 **Figure S15. Timeseries of particle number size distribution (a) and (e), mass concentration of**

160 **NR-PM<sub>1</sub> (b) and (f), particle number concentration in 14.6, 41.4, and 109.4 nm (c) and (g),**

161 **mass concentration of black carbon (d) and (h); The figure letters from (a) to (d) means the**

162 **data in summer, and the figure letters from (e) to (h) means the data in winter; The number 1**

163 **represented the data before data quality control and the number 2 represent the data after**

164 **data quality control.**

165

166

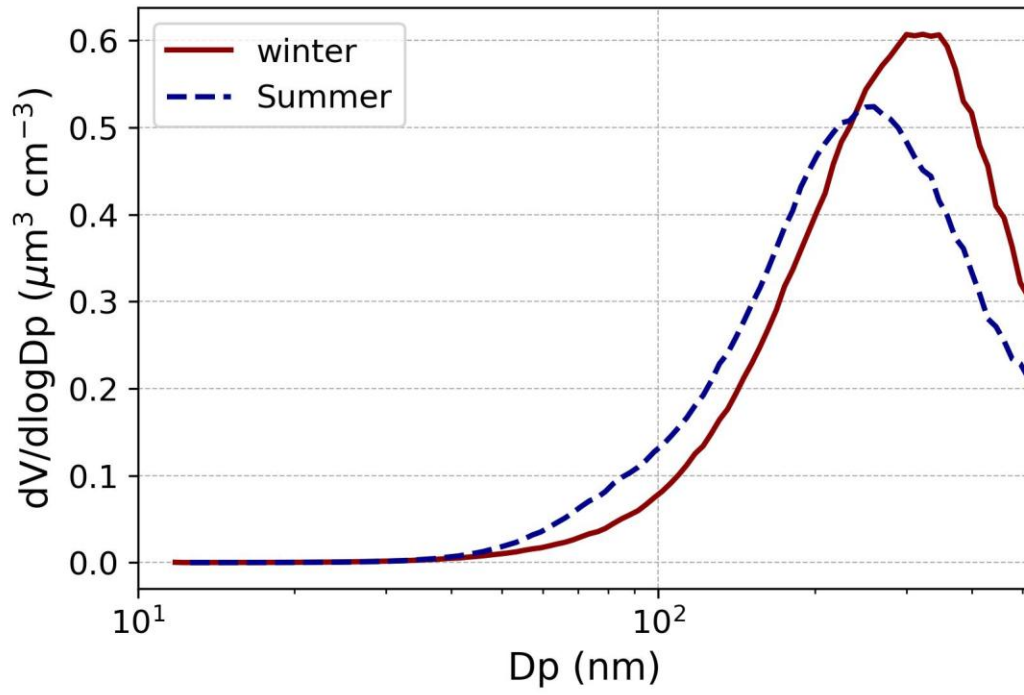

167

168 **Figure S16. The average particle volume size distribution during summer and winter.**

169

Summer

Luzon island:

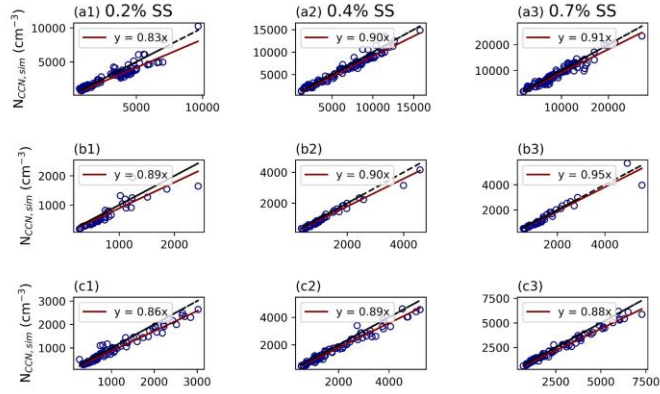

Indochinese Peninsula:

Marine:

Winter

Mainland China:

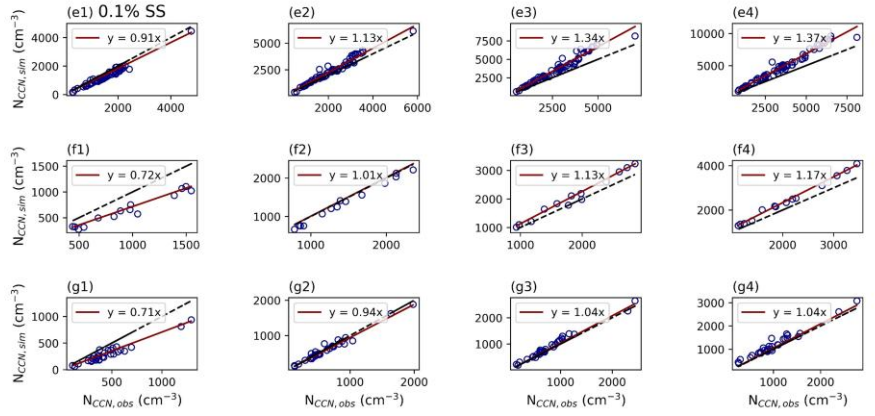

Mixed:

Marine:

170

171

Figure S17. The fitting result in “Internal-mixed” scheme according to CCN closure method.

Summer

Luzon island:

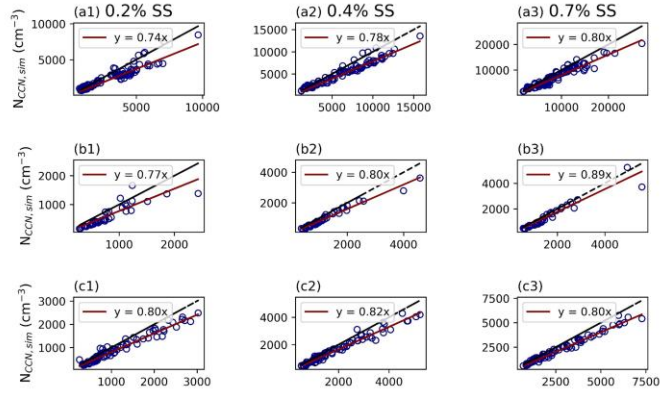

Indochinese Peninsula:

Marine:

Winter

Mainland China:

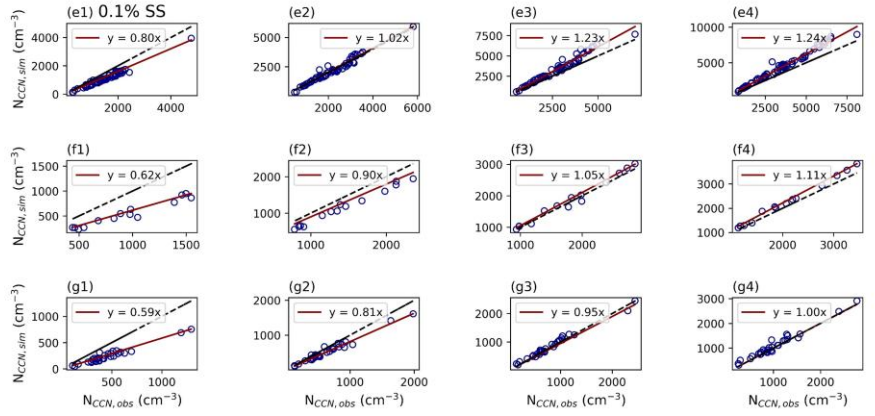

172

173

Figure S18. The fitting result in “External-mixed” scheme according to CCN closure method.

174

175



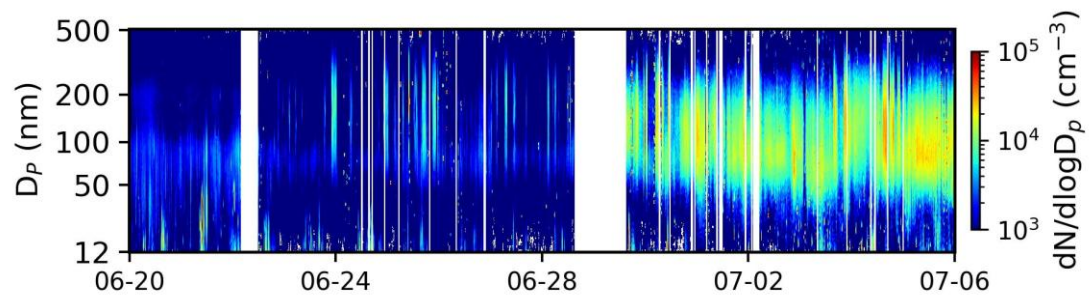

176

177 **Figure S19. Timeseries of particle number size distribution in June 2022 in South China Sea.**

178

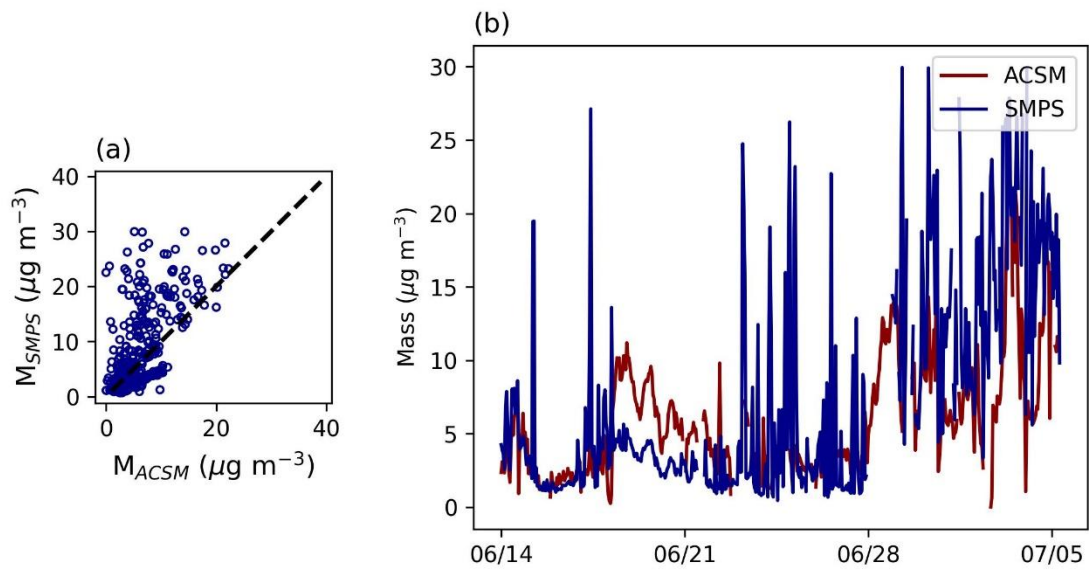

179

180 **Figure S20. Comparison of mass concentration from ACSM and SMPS (a), the timeseries of**  
181 **mass concentration of ACSM and SMPS (b).**

182

183

184 **Reference**

185 Atwood, S. A., Reid, J. S., Kreidenweis, S. M., Blake, D. R., Jonsson, H. H., Lagrosas, N. D., Xian,  
186 P., Reid, E. A., Sessions, W. R., and Simpas, J. B.: Size-resolved aerosol and cloud condensation nuclei  
187 (CCN) properties in the remote marine South China Sea – Part 1: Observations and source classification,  
188 *Atmos. Chem. Phys.*, 17, 1105-1123, doi:<https://doi.org/10.5194/acp-17-1105-2017>, 2017.

189 Crenn, V., Sciare, J., Croteau, P. L., Verlhac, S., Frohlich, R., Belis, C. A., Aas, W., Aijala, M.,  
190 Alastuey, A., Artinano, B., Baisnee, D., Bonnaire, N., Bressi, M., Canagaratna, M., Canonaco, F.,  
191 Carbone, C., Cavalli, F., Coz, E., Cubison, M. J., Esser-Gietl, J. K., Green, D. C., Gros, V., Heikkinen,  
192 L., Herrmann, H., Lunder, C., Minguillon, M. C., Mocnik, G., O'Dowd, C. D., Ovadnevaite, J., Petit, J.  
193 E., Petralia, E., Poulain, L., Priestman, M., Riffault, V., Ripoll, A., Sarda-Estevé, R., Slowik, J. G., Setyan,  
194 A., Wiedensohler, A., Baltensperger, U., Prevot, A. S. H., Jayne, J. T., and Favez, O.: ACTRIS ACSM  
195 intercomparison - Part 1: Reproducibility of concentration and fragment results from 13 individual  
196 Quadrupole Aerosol Chemical Speciation Monitors (Q-ACSM) and consistency with co-located  
197 instruments, *Atmos Meas Tech*, 8, 5063-5087, doi:<https://doi.org/10.5194/amt-8-5063-2015>, 2015.

198 Drinovec, L., Močnik, G., Zotter, P., Prévôt, A.S.H., Ruckstuhl, C., Coz, E., Rupakheti, M., Sciare,  
199 J., Müller, T., Wiedensohler, A., Hansen, A.D.A., 2015. The "dual-spot" Aethalometer: an improved  
200 measurement of aerosol black carbon with real-time loading compensation. *Atmos. Meas. Tech.* 8, 1965-  
201 1979.

202 Geller, M., Biswas, S., Sioutas, C., 2006. Determination of Particle Effective Density in Urban  
203 Environments with a Differential Mobility Analyzer and Aerosol Particle Mass Analyzer. *Aerosol Sci*  
204 *Tech* 40, 709-723.

205 Kuang, Y., He, Y., Xu, W., Zhao, P., Cheng, Y., Zhao, G., Tao, J., Ma, N., Su, H., Zhang, Y., Sun, J.,  
206 Cheng, P., Yang, W., Zhang, S., Wu, C., Sun, Y., Zhao, C., 2020. Distinct diurnal variation in organic  
207 aerosol hygroscopicity and its relationship with oxygenated organic aerosol. *Atmos. Chem. Phys.* 20,  
208 865-880.

209 Liang, B., Cai, M., Sun, Q., Zhou, S., and Zhao, J.: Source apportionment of marine atmospheric  
210 aerosols in northern South China Sea during summertime 2018, *Environmental Pollution*, 289, 117948,  
211 doi:<https://doi.org/10.1016/j.envpol.2021.117948>, 2021.

212 Middlebrook, A. M., Bahreini, R., Jimenez, J. L., and Canagaratna, M. R.: Evaluation of  
213 Composition-Dependent Collection Efficiencies for the Aerodyne Aerosol Mass Spectrometer using  
214 Field Data, *Aerosol Sci Tech*, 46, 258-271, doi:<https://doi.org/10.1080/02786826.2011.620041>, 2012.

215 Nakayama, T., Kondo, Y., Moteki, N., Sahu, L.K., Kinase, T., Kita, K., Matsumi, Y., 2010. Size-  
216 dependent correction factors for absorption measurements using filter-based photometers: PSAP and  
217 COSMOS. *Journal of Aerosol Science* 41, 333-343.

218 Schwarz, J. P., Gao, R. S., Spackman, J. R., Watts, L. A., Thomson, D. S., Fahey, D. W., Ryerson,  
219 T. B., Peischl, J., Holloway, J. S., Trainer, M., Frost, G. J., Baynard, T., Lack, D. A., de Gouw, J. A.,  
220 Warneke, C., and Del Negro, L. A.: Measurement of the mixing state, mass, and optical size of individual  
221 black carbon particles in urban and biomass burning emissions, 35,  
222 doi:<https://doi.org/https://doi.org/10.1029/2008GL033968>, 2008.

223 Sun, Q., Liang, B., Cai, M., Zhang, Y., Ou, H., Ni, X., Sun, X., Han, B., Deng, X., Zhou, S., and  
224 Zhao, J.: Cruise observation of the marine atmosphere and ship emissions in South China Sea: Aerosol  
225 composition, sources, and the aging process, *Environ. Pollut.* 316, 120539,  
226 doi:<https://doi.org/https://doi.org/10.1016/j.envpol.2022.120539>, 2023.

227 Sun, Y., Jiang, Q., Xu, Y., Ma, Y., Zhang, Y., Liu, X., Li, W., Wang, F., Li, J., Wang, P., Li, Z., 2016.  
228 Aerosol characterization over the North China Plain: Haze life cycle and biomass burning impacts in  
229 summer. *121*, 2508-2521.

230 Wang, Q., Zhao, J., Du, W., Ana, G., Wang, Z., Sun, L., Wang, Y., Zhang, F., Li, Z., Ye, X., Sun, Y.,  
231 2016. Characterization of submicron aerosols at a suburban site in central China. *Atmos Environ.* 131,  
232 115-123.

233 Zhu, W., Zhong, K., Li, Y., Xu, Q., and Fang, D.: Characteristics of hydrocarbon accumulation and  
234 exploration potential of the northern South China Sea deepwater basins, *Chinese Science Bulletin*, 57,  
235 3121-3129, doi:<https://doi.org/10.1007/s11434-011-4940-y>, 2012.

236
